# Supplementary material for: Multi-Generational Kinship, Multiple Mating, and Flexible Modes of Parental Care in a Breeding Population of the Veery (Catharus fuscescens), a Trans-Hemispheric Migratory Songbird
Source: PLoS One. 2016 Jun 22;11(6):e0157051. doi: 10.1371/journal.pone.0157051 (PMC4917174; doi:10.1371/journal.pone.0157051)
Supplement: S2 File — Excel spreadsheet with distributions of alleles at 6 microsatellite loci used in this study, from a sample of 37 adult Veeries and 21 offspring at White Clay Creek State Park, DE. (XLSX) [file pone.0157051.s002.xlsx]

## Sheet: S2_File
Tube #	BIRD	Cu?02a	Cu?02b	Cu?04a	Cu?04b	Cu?05a	Cu?05b	Cu?10a	Cu?10b	Cu?28a	Cu?28b	Cu?32a	Cu?32b
1	AORX	G	K	A	C	E	I	H	I	N	O	B	B
3	AXRO	E	L	B	H	C	E	D	H	F	I	B	B
5	FLOX	B	D	C	C	C	E	A	D	F	J	C	F
7	GRXL	J	L	F	I	E	E	G	H	B	H	C	C
9	LGOX	F	G	F	K	E	E	C	D	G	N	B	C
11	LXMA	C	D	C	E	C	E	E	K	F	G	B	B
13	MWFX	H	O	A	E	G	N	D	L	I	J	B	E
15	MWYX	G	H	C	F	H	H	J	M	I	R	B	D
17	OAMX	B	C	A	A	E	E	D	J	I	J	A	B
19	PXRA	H	I	A	G	E	E	D	K	H	I	A	D
21	XABL	F	J	A	F	E	H	E	H	E	M	A	B
23	XAGO	H	J	F	J	A	E	D	I	E	G	B	B
25	XARR	I	L	A	A	E	I	E	J	G	I	B	B
27	XARY	H	I	A	E	E	E	D	E	D	G	F	F
29	XAWO	I	L	C	E	C	D	E	I	H	J	B	E
31	XBRY	I	I	F	G	E	E	D	D	G	J	D	D
33	XBWW	G	I	C	D	G	M	G	H	D	G	B	B
35	XFOW	G	I	C	J	E	E	A	F	D	G	A	C
37	XFYB	G	L	E	E	E	G	A	E	F	P	B	B
39	XGLA	K	M	A	C	E	G	A	C	I	I	B	B
41	XGOA	E	L	C	G	E	E	E	K	G	Q	E	G
43	XGYO	A	I	D	G	C	E	D	N	D	D	B	B
45	XLLB	H	L	A	G	E	J	D	K	F	H	C	C
47	XLOB	C	J	F	G	F	I	E	H	B	O	B	B
49	XMYA	E	G	A	F	C	E	A	J	D	G	B	B
51	XOBG	E	L	A	A	C	E	A	I	G	H	B	B
53	XOLY	F	K	A	F	E	E	B	D	G	H	D	D
55	XOBW	H	J	C	J	E	E	B	F	A	H	B	B
57	XRAW	A	H	A	D	E	E	I	N	F	F	B	E
59	XROB	H	I	A	F	E	H	A	E	H	N	B	C
61	XWLF	D	J	C	E	G	I	F	M	I	L	E	E
63	XWOO	A	O	A	E	C	D	D	D	D	D	A	E
65	XWRY	N	P	C	E	G	H	J	K	E	G	F	G
67	YBXY	D	J	C	G	E	L	B	F	H	M	C	C
69	YMBX	D	G	C	E	C	E	A	E	D	K	B	D
71	YXMG	I	J	C	C	E	K	D	I	F	M	D	E
73	PLXM	C	K	A	H	G	I	D	M	E	F	F	G
75	1A	B	C	C	H	C	G	A	D	F	J	F	F
77	1B	B	C	A	C	E	I	D	M	E	F	F	G
79	1C	D	K	C	H	C	G	A	M	E	J	F	G
81	1D	D	K	A	C	E	I	D	M	E	J	F	F
83	4A	H	J	A	E	E	G	E	F	G	I	F	F
85	4B	H	J	A	C	E	G	E	F	D	I	F	F
87	4C	H	J	A	C	E	G	E	M	G	I	F	F
89	7A	K	L	B	I	C	E	D	G	H	I	B	C
91	7B	J	L	B	I	E	E	G	H	C	I	B	C
93	8A	C	N	C	C	C	H	J	K	F	G	B	G
95	8B	K	N	B	C	C	H	D	K	G	I	B	G
97	10A	E	G	C	H	E	E	F	H	F	G	B	C
99	10B	E	I	B	C	C	E	F	H	D	I	B	C
101	10C	E	G	B	C	C	E	A	H	G	I	A	B
103	17A	F	G	F	J	A	E	C	D	B	G	C	C
105	18A	B	I	F	G	B	C	D	J	E	N	B	B
107	18B	A	B	F	J	E	E	J	N	E	N	B	B
109	15A	E	I	A	C	E	E	E	H	G	H	B	C
111	15B	K	L	A	C	F	I	B	E	H	I	A	B
113	11-3B	H	M	C	C	E	H	E	F	H	H	C	G
115	11-3C	H	M			E	J	F	F	F	K	B	C
